# Supplementary material
Source: PubMed Central journal article supplement (PMC4509746)

**A**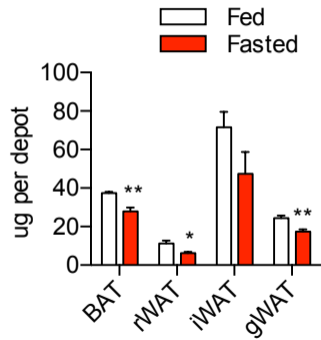**B**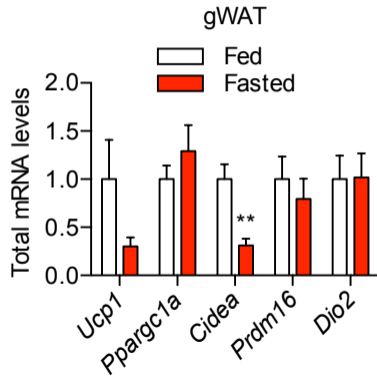**C**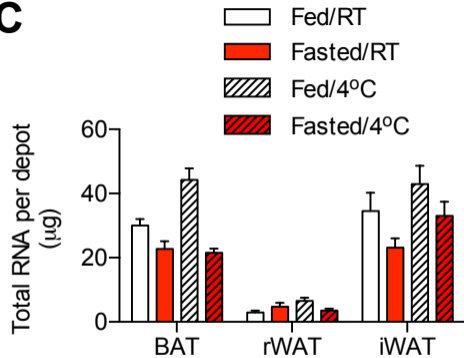**D**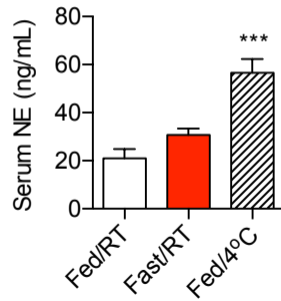

Supplement: NIHMS628117-supplement-1.pdf [file NIHMS628117-supplement-1.pdf]

**A**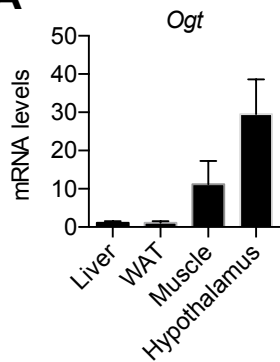**B**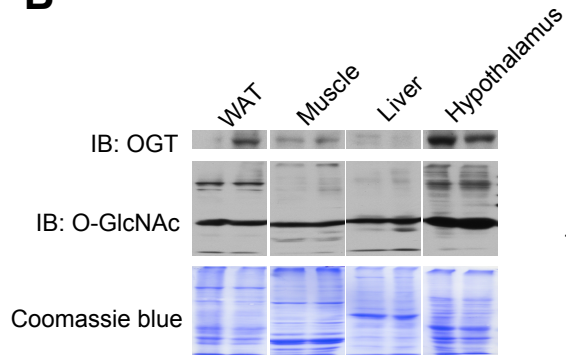**C**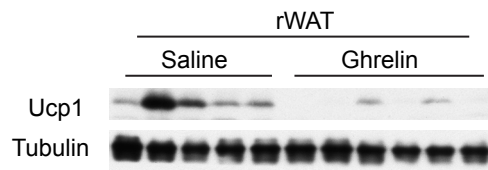**D**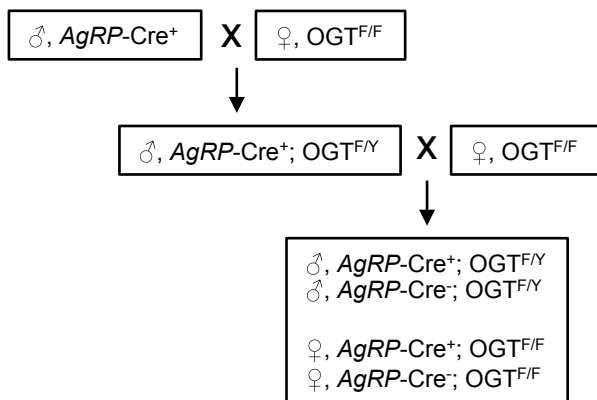**E**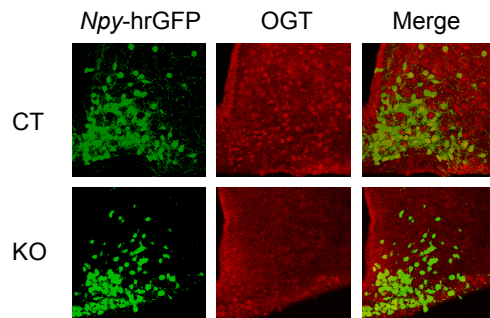**F**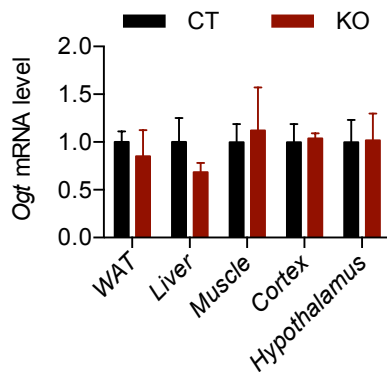**G**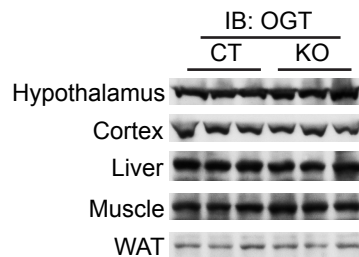

Supplement: NIHMS628117-supplement-2.pdf [file NIHMS628117-supplement-2.pdf]

**A**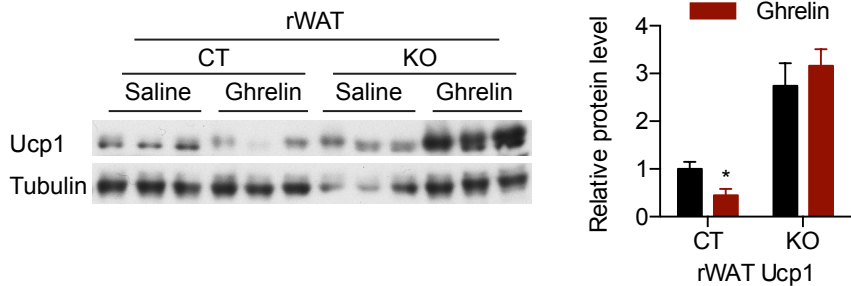**B**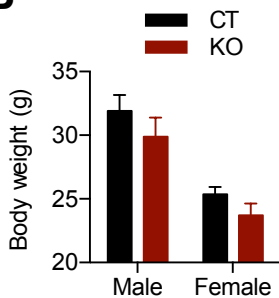**C**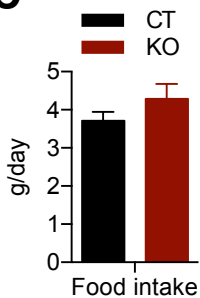**D**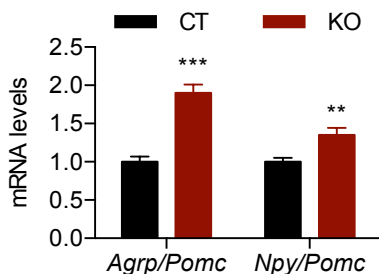**E**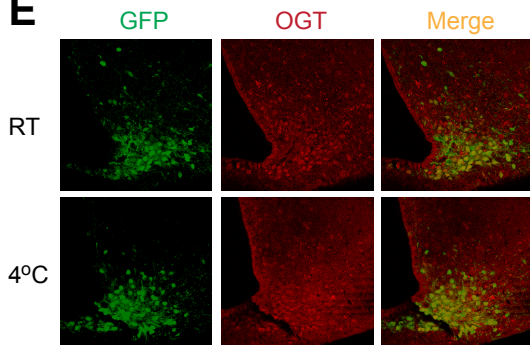**F**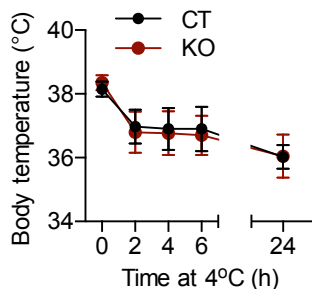**G**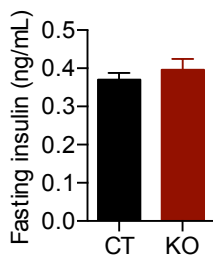**H**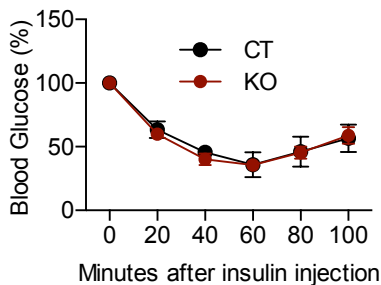

Supplement: NIHMS628117-supplement-3.pdf [file NIHMS628117-supplement-3.pdf]

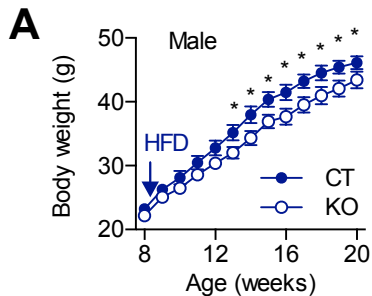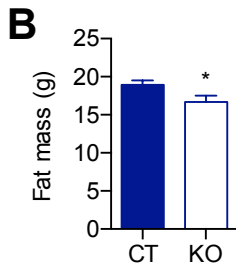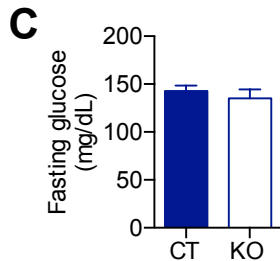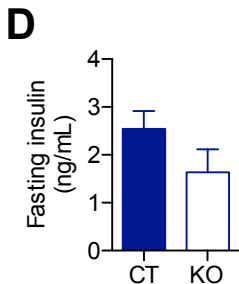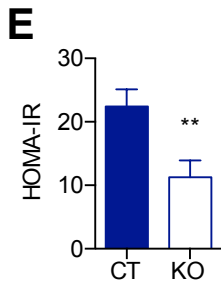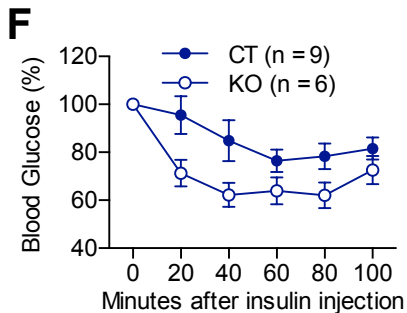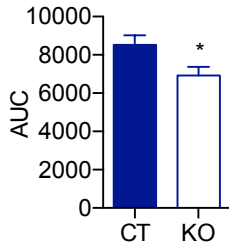

Supplement: NIHMS628117-supplement-4.pdf [file NIHMS628117-supplement-4.pdf]
